# Supplementary material for: Performance metrics of triboelectric nanogenerator toward record-high output energy density
Source: Royal Society of Chemistry journal article supplement (doi:10.1039/d5ee00376h), 2025-01-01
Supplement: d5ee00376h1.pdf [file d5ee00376h1.pdf]

## Supplementary Information

# **Performance Metrics of Triboelectric Nanogenerator toward Record-High Output Energy Density**

Ru Guo<sup>1</sup>, Hang Luo<sup>4</sup>, Shaoshuai He<sup>2</sup>, Xin Xia<sup>2</sup>, Tingting Hou<sup>1</sup>, Haoyu Wang<sup>1</sup>, Chaojie Chen<sup>1</sup>, Dou Zhang<sup>4</sup>, Yunlong Zi<sup>\*1,2,3</sup>

<sup>1</sup> Department of Mechanical and Automation Engineering, The Chinese University of Hong Kong, Shatin, N.T. Hong Kong, China

<sup>2</sup> Thrust of Sustainable Energy and Environment, The Hong Kong University of Science and Technology (Guangzhou), Nansha, Guangzhou, Guangdong, 511400, China

<sup>3</sup> Guangzhou HKUST Fok Ying Tung Research Institute, Nansha, Guangzhou, Guangdong 511457, China

<sup>4</sup> Powder Metallurgy Research Institute, State Key Laboratory of Powder Metallurgy, Central South University, Changsha, 410083, Hunan Province, China

Correspondence: ylzi@hkust-gz.edu.cn

**Supplementary Note 1. Theoretical maximum output energy density limited by dielectric breakdown in SFT-TENG.**

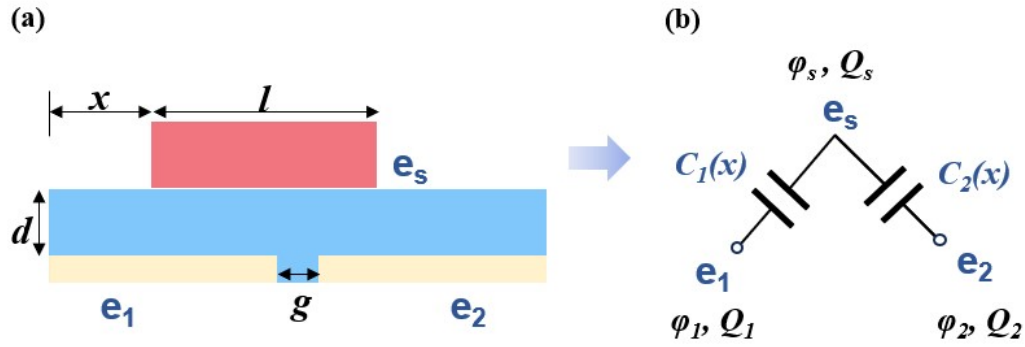

**Supplementary Figure 1.** (a) Physical structure and (b) electric model of SFT-TENG with critical parameters.

As shown in Supplementary Figure 1, a simplified physical and electric model of SFT-TENG was constructed to explore the maximized output energy density limited by dielectric breakdown in SFT-TENG.

When the slider moves onto the left electrode, i.e., the movement distance ( $x$ )  $x=0$ , at the open-circuit state, the electrical potential difference between the two output electrodes is zero, given as follow:

$$V_{21} = \varphi_2 - \varphi_1 = 0 \quad (1)$$

Here, the capacitance ( $C_1$ ) between slider dielectric and left output electrode is described as follow:

$$C_1(x=0) = \frac{\varepsilon_0 \varepsilon_r l w}{d} \quad (2)$$

Where  $\varepsilon_0$  and  $\varepsilon_{ri}$  are vacuum permittivity and relative permittivity of dielectric layer,

and  $l$ ,  $w$ , and  $d$  are electrode length, width, and stator dielectric thickness, respectively.

Meanwhile, the capacitance ( $C_2(x=0)$ ) between slider dielectric and right output electrode will be very small, about  $10^{-3} \sim 10^{-4} C_1(x=0)$ .

The charge amount on the slider surface ( $Q_s$ ) is given by multiplying the charge density ( $\sigma$ ) by the area according to the equation:

$$Q_s = \sigma l w \quad (3)$$

Hence, the charge amount between capacitance  $C_1$  and  $C_2$  can be described as following formula, where  $\beta$  is the proportionality coefficient:

$$Q_1 = \frac{-Q_s C_1(x=0)}{C_1(x=0) + C_2(x=0)} \approx \sigma l w \beta, \quad (\beta \sim 99.9\%) \quad (4)$$

$$Q_2 = -Q_s + Q_1 = -\sigma l w (1 - \beta) \quad (5)$$

When slider moves displacement of  $x_0$ , i.e., at  $x=x_0$  ( $x_0 > g$ ),  $Q_1$  and  $Q_2$  keep open-circuit state, the  $C_1(x=x_0)$  and  $C_2(x=x_0)$  will be expressed as:

$$C_1(x=x_0) = \frac{\epsilon_0 \epsilon_r (l - x_0) w}{d} \quad (6)$$

$$C_2(x=x_0) = \frac{\epsilon_0 \epsilon_r (x_0 - g) w}{d} \quad (7)$$

Hence, according to the equation (4-7), the corresponding voltage on  $C_1(x=x_0)$  and  $C_2(x=x_0)$  is present, respectively:

$$V_{s1} = \frac{-Q_1}{C_1(x=x_0)} = \frac{\sigma l d \beta}{\epsilon_0 \epsilon_r (l - x_0)} \quad (8)$$

$$V_{s2} = \frac{-Q_2}{C_2(x=x_0)} = \frac{\sigma l (1 - \beta) d}{\epsilon_0 \epsilon_r (x_0 - g)} \quad (9)$$

So, the electric potential difference between two output electrodes is expressed as:

$$V_{12} = V_{oc}(x = x_0) = V_{s1} - V_{s2} = \frac{\sigma l d}{\varepsilon_0 \varepsilon_r} \left( \frac{\beta}{l - x_0} - \frac{1 - \beta}{x_0 - g} \right) \quad (10)$$

We assume the energy output of SFT-TENG is mainly limited by dielectric breakdown.

The following unequal relationship should be meet:

$$V_{s1} \leq E_b d \quad (11)$$

Where  $E_b$  is electric breakdown strength of the stator dielectric.

From equation (8, 11), the charge density can be expressed as:

$$\begin{aligned} \sigma &\leq \frac{\varepsilon_0 \varepsilon_r E_b (l - x_0)}{l \beta} \approx \frac{\varepsilon_0 \varepsilon_r E_b (l - x_0)}{l} \\ &\leq \frac{\varepsilon_0 \varepsilon_r E_b (l - g)}{l} \end{aligned} \quad (12)$$

$$V_{12} \leq E_b (l - x_0) d \left( \frac{\beta}{l - x_0} - \frac{1 - \beta}{x_0 - g} \right) \approx E_b d \beta \quad (13)$$

From equations (9,10),

Hence, the energy density of half-cycle ( $U_{half-cycle}$ ) defined as the energy output ( $E$ ) per unit volume ( $V$ ) can be described as:

$$U_{half-cycle} = \frac{E}{V} = \frac{Q_s V_{12}}{(2l + g) w d} \quad (14)$$

Combining equations (3, 13), the  $U_{half-cycle}$  is given as follow:

$$\begin{aligned} U_{half-cycle} &= \frac{V_{12} \sigma l}{w(2l + g) d} \\ &\leq \varepsilon_0 \varepsilon_r E_b^2 \left( \frac{l - g}{2l + g} \right) \end{aligned} \quad (15)$$

Considering the inevitable energy loss caused by dielectric loss, a parameter of loss factor ( $\tan \delta$ ) is introduced here. Therefore, the equation (15) is revised as follow:

$$U_{half-cycle} \leq (1 - \tan \delta) \varepsilon_0 \varepsilon_r E_b^2 \left( \frac{l - g}{2l + g} \right) \quad (16)$$

In addition, regarding to structural parameters of SFT-TENG, the gap distance ( $g$ ) between two output electrodes cannot be too small, otherwise it may cause gap discharge. In order to avoid gap breakdown, the following relationship is needed:

$$\frac{V_{12}}{g} \leq E_b \quad (17)$$

From equation (11), it can be seen:

$$V_{12} \approx \frac{\sigma dl}{\varepsilon_0 \varepsilon_r (l - x_0)} \quad (18)$$

Hence, gap distance  $g$  needs to be met:

$$g \geq d \frac{\sigma}{\varepsilon_0 \varepsilon_r} \frac{l}{l - x_0} \frac{1}{E_d} \quad (19)$$

In mathematical analysis,

$$g > d \frac{\sigma}{\varepsilon_0 \varepsilon_r} \frac{l}{l - g} \frac{1}{E_d} \quad (20)$$

Let  $A_0 = \frac{d \sigma}{l \varepsilon_0 \varepsilon_r E_d}$ , the equation (20) is expressed as:

$$g^2 - lg + A_0 l^2 < 0 \quad (21)$$

Then,  $g$  is solved as:

$$\frac{l + \sqrt{l^2 - 4A_0 l^2}}{2} > g > \frac{l - \sqrt{l^2 - 4A_0 l^2}}{2} \quad (22)$$

Considering  $d \ll l$ ;  $\sigma \sim \varepsilon_0 \varepsilon_r E_b$ ,  $A_0 \ll 1$ , there is an unequal relationship as follows:

$$l > g > 2A_0 l \approx 2d \quad (23)$$

So, the equation (16) is expressed as:

$$U_{half-cycle} \leq \frac{1}{2} (1 - \tan \delta) \varepsilon_0 \varepsilon_r E_b^2 \left( \frac{l - 2d}{l + d} \right) \quad (24)$$

Finally, the energy density in one cycle of movement can be obtain as follow:

$$U_{one-cycle} \leq (1 - \tan\delta)\varepsilon_0\varepsilon_r E_b^2 \left( \frac{l-2d}{l+d} \right) \quad (25)$$

It can be concluded that the maximized output energy density of SFT-TENG is mainly influence by the material characteristics of relative permittivity ( $\varepsilon_r$ ), loss factor ( $\tan\delta$ ) and breakdown strength ( $E_b$ ); and the structural factors of electrode length, dielectric thickness, etc.

**Supplementary Note S2. Theoretical charge density of SFT-TENG under high-voltage excitation.**

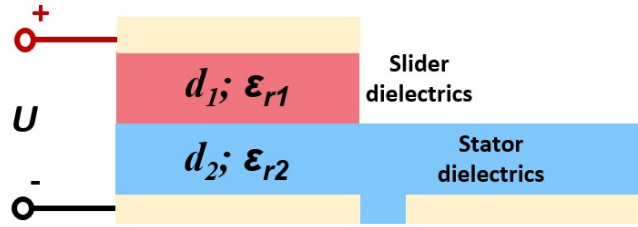

**Supplementary Figure 2.** The structure model of SFT-TENG under high-voltage excitation.

As shown in Supplementary Figure 2, when the slider moves onto one of the output electrodes, the equivalent circuit of SFT-TENG could be regarded as parallel plate capacitance model. The capacitance ( $C$ ) of the TENG is described as follow:

$$\frac{1}{C} = \frac{1}{C_1} + \frac{1}{C_2} \quad (26)$$

Where the  $C_i$  ( $i=1, 2$ ) can be given as follow:

$$C_i = \frac{\epsilon_0 \epsilon_{ri} S}{d_i} \quad (27)$$

Where  $\epsilon_0$  and  $\epsilon_{ri}$  are vacuum permittivity and relative permittivity of dielectric layer, respectively, and  $d_i$  is thickness of dielectric,  $S$  is the area of the electrode area.

So, the capacitance of TENG ( $C$ ) is described as follow:

$$C = \frac{\epsilon_0 S}{\left( \frac{d_1}{\epsilon_{r1}} + \frac{d_2}{\epsilon_{r2}} \right)} \quad (28)$$

Then, according to the charge conservation:

$$CU = \sigma S \quad (29)$$

Where  $U$  is external applied voltage,  $\sigma$  is the surface charge density.

$$\sigma = \frac{\varepsilon_0 U}{\left(\frac{d_1}{\varepsilon_{r1}} + \frac{d_2}{\varepsilon_{r2}}\right)} \quad (30)$$

Hence, the  $\sigma$  can be described as follow:



**(a) Traditional TENG**

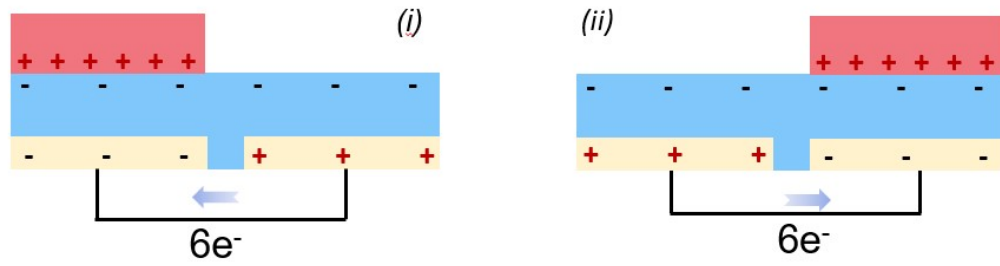

**(b) Charge-excitation TENG**

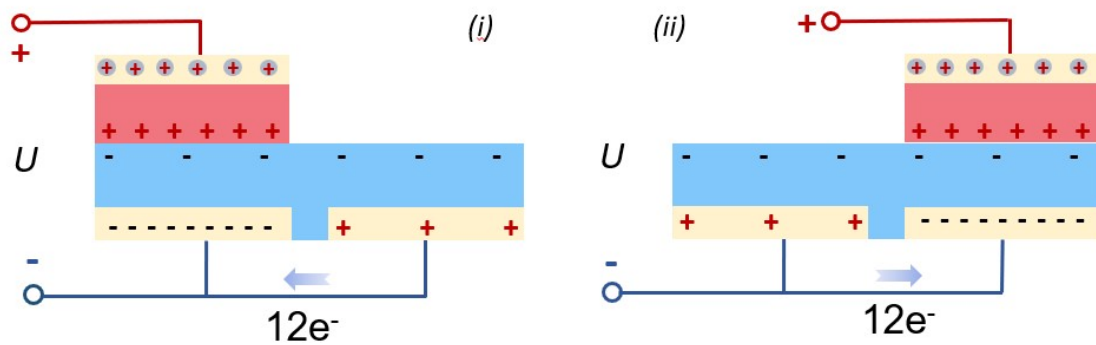

**Supplementary Figure 3.** Charge transferring mechanism for (a) traditional TENG and (b) charge-excitation TENG.

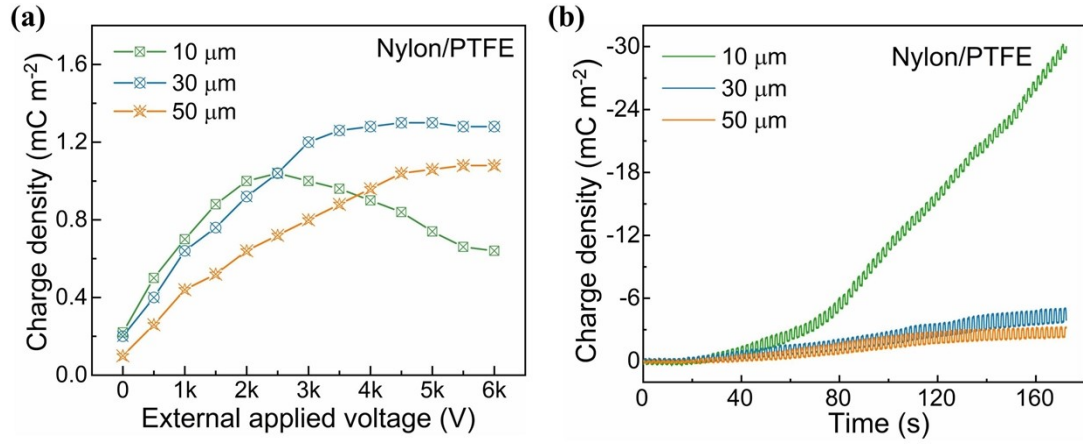

**Supplementary Figure 4.** (a) Charge excitation curve and (b) charge density of SFT-TENG (Nylon/PTFE pair) with different PTFE film thickness.

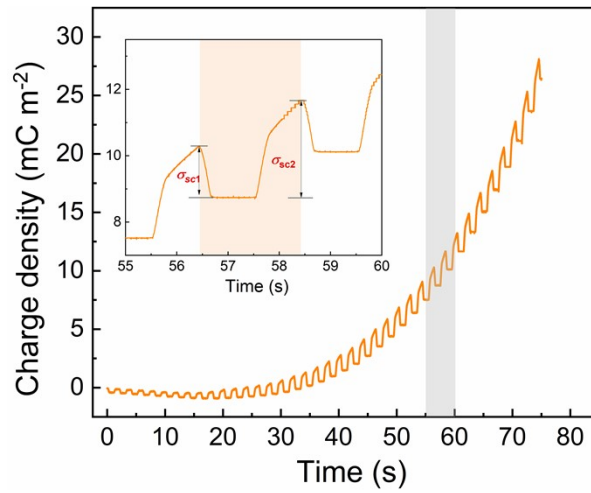

**Supplementary Figure 5.** Charge density curve of SFT-TENG with leakage effect.

Considering the voltage-charge ( $V$ - $Q$ ) plot per cycle to quantify the maximized output energy density, the charge density generated during two half-cycles was defined as  $\sigma_{sc1}$  and  $\sigma_{sc2}$ , respectively.

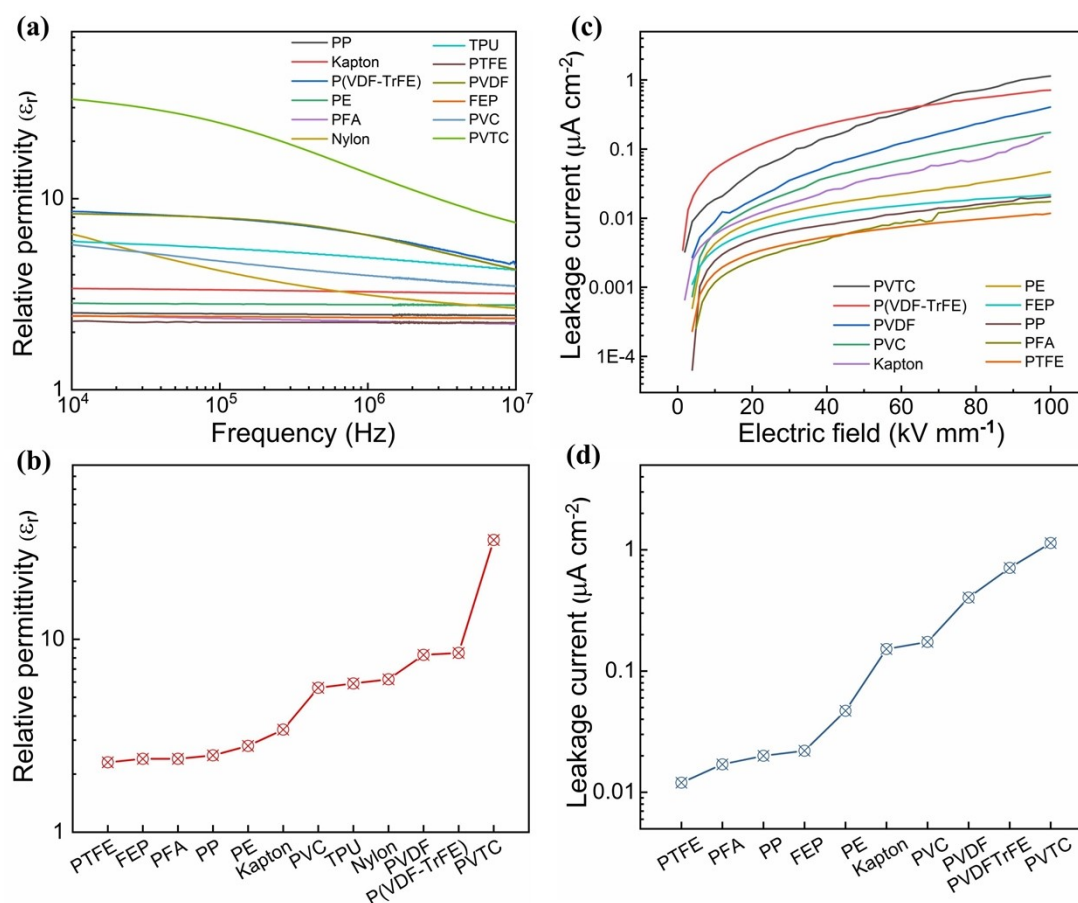

**Supplementary Figure 6.** (a) Frequency dependence of relative permittivity for different dielectrics used in SFT-TENG. (b) Comparison of relative permittivity at 10 kHz. (c) Leakage current density of different dielectrics under high electric field. (d) Comparison of leakage current density at the same electric field of  $100 \text{ kV mm}^{-1}$ .

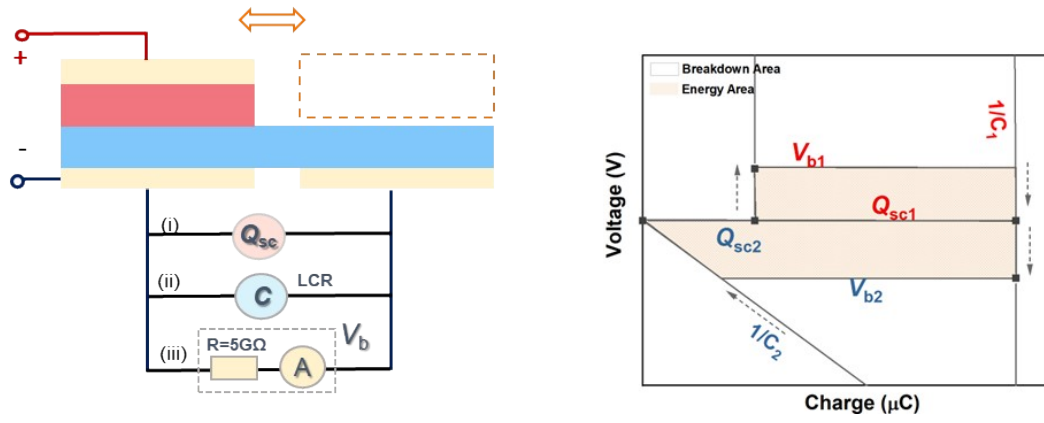

**Supplementary Figure 7.** (a) Test circuit schematic diagram for the key parameters ( $Q_{sc}$ ,  $V_b$ , and  $C$ ) of the  $V$ - $Q$  plot. (b) The revised  $V$ - $Q$  plot of SFT-TENG under the effect of charge excitation for the determination of the maximized output energy density.

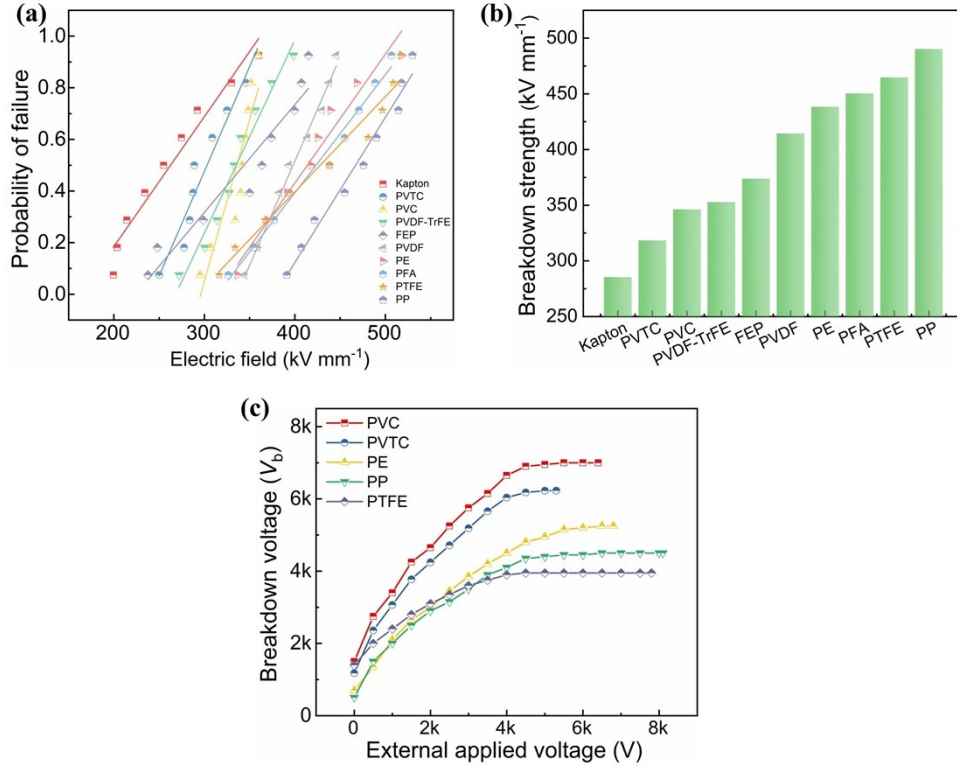

**Supplementary Figure 8.** (a) Characterization of dielectric breakdown strength by Weibull distribution (b) Comparison of intrinsic breakdown strength ( $E_b$ ) of dielectrics. (c) Relationship curve of breakdown voltage  $V_b$  and external applied voltage of several typical dielectrics.

**Characterization of intrinsic breakdown strength of dielectric materials:** A two-parameter Weibull cumulative probability function was used to analyze the  $E_b$  of 10 kinds of tribomaterials as the following equation:

$$P(E) = 1 - \exp\left[-\left(E/E_b\right)^\beta\right] \quad (31)$$

where  $P(E)$  is the cumulative failure probability,  $E$  is the breakdown strength obtained through experimental tests. The characteristic breakdown strength  $E_b$  refers to the field strength when the breakdown probability is 63.2%. The  $E_b$  of each dielectric was obtained from a fit using Weibull failure statistics across 9 test samples (Supplementary Figure 8a). Then the comparison of all the  $E_b$  values was present in Supplementary

Figure 8b. As a whole, the linear dielectrics with low-permittivity, like PP, PTFE, PFA, etc., possess higher  $E_b$  values than those nonlinear dielectrics with high permittivity, like kapton, PVTC, PVC, etc.

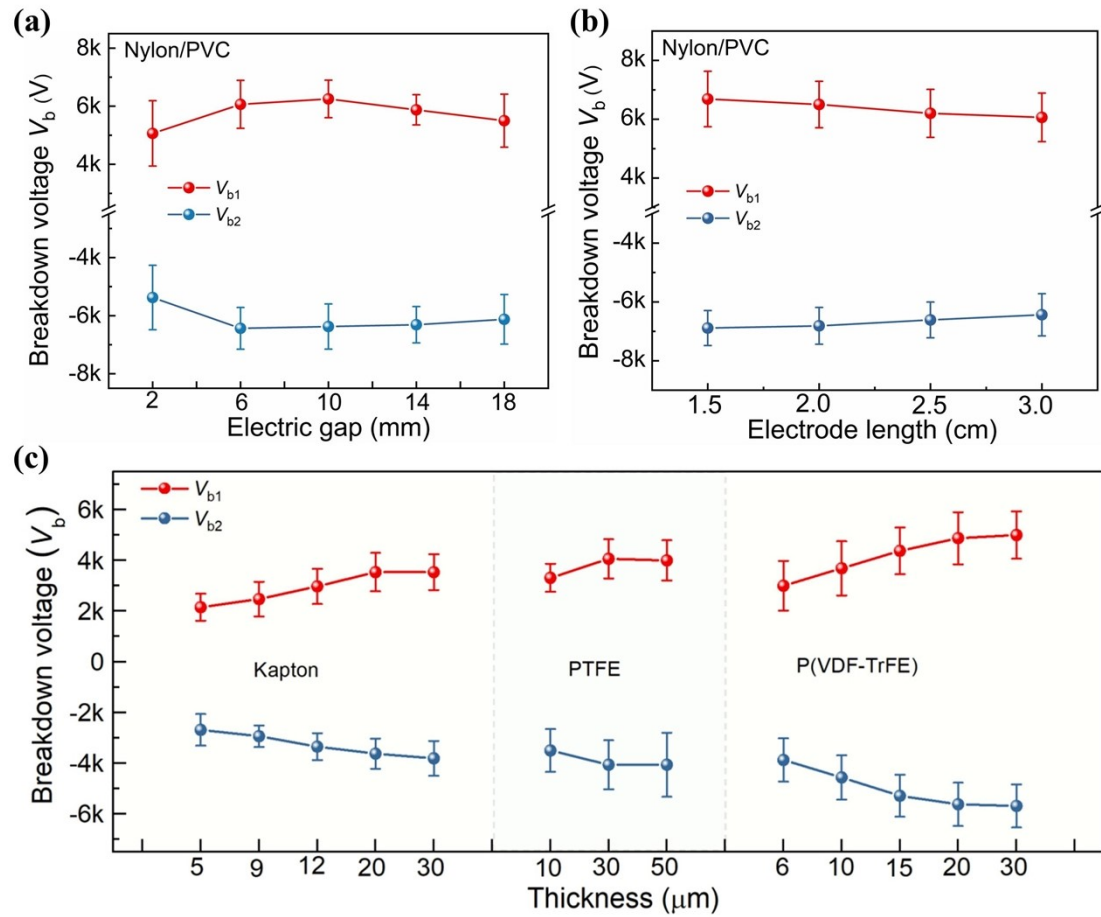

**Supplementary Figure 9.** Breakdown voltage of SFT-TENG with different structural factors: (a) electrode gap, (b) electrode length, (c) film thickness.

**The effect of structure factors on the breakdown voltage:** The influence of structure factors on the  $V_b$  of TENG was discussed here. In Supplementary Figure 9a, with an enlarging electrode gap from 2 mm to 18 mm, both  $V_{b1}$  and  $V_{b2}$  show a trend of first increasing and then slightly decreasing with an optimal distance obtained at 6 mm. Too

small or large gap distance is not desirable because of increasing the possibility of gap breakdown discharge and decreasing charge density, respectively. Besides, Supplementary Figure 9a shows increasing electrode length easily reduces the  $V_{b1}$  and  $V_{b2}$ , which is attributed to the fact that the larger electrode area covers more internal defects in the dielectric, making it easier to induce dielectric breakdown. Finally, an obvious decline of  $V_{b1}$  and  $V_{b2}$  was observed in Supplementary Figure 9c for all three dielectric of Kapton, PTFE, and P(VDF-TrFE) with the reduction of film thickness, which could explained by the enhanced exerted electric field and increased leakage conductivity from thinner dielectric.

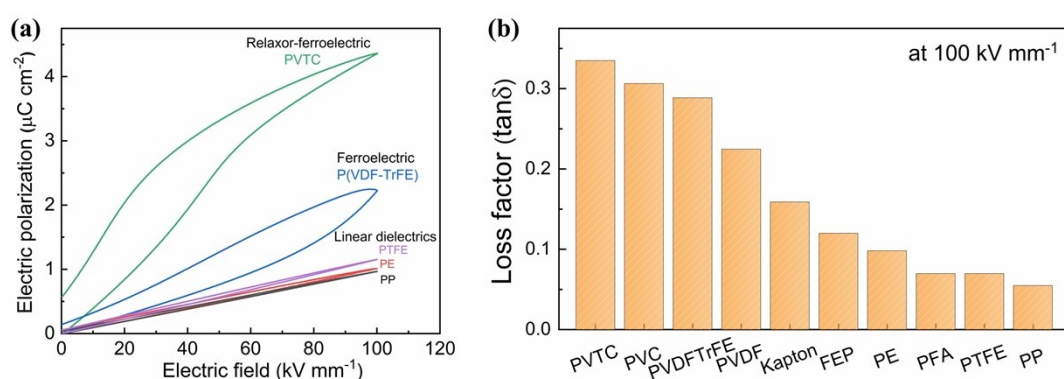

**Supplementary Figure 10.** (a) Polarization hysteresis loops of representative triboelectric polymers. (b) Loss factor ( $\tan\delta$ ) of different dielectrics.

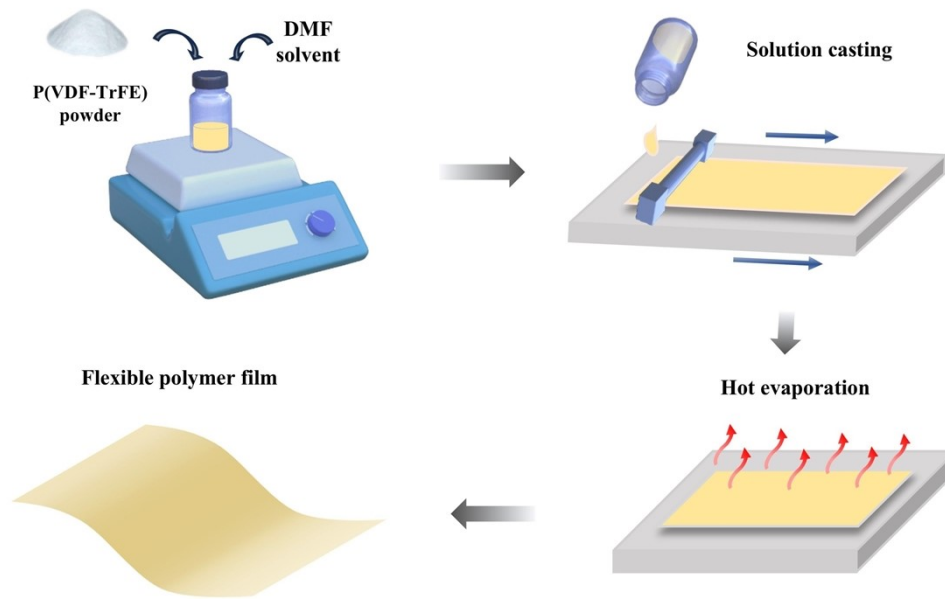

**Supplementary Figure 11.** Scheme of the preparation of stretched P(VDF-TrFE) film.

**Preparation of stretched P(VDF-TrFE) film:** Firstly, the raw P(VDF-TrFE) powders were proportionally (10 wt.%) added in N, N-dimethylformamide solvent and stirred at 60°C for 6h until fully dissolved. Then the solution was poured on a clear glass substrate followed by tape casting by a scraper with a clearance of 400  $\mu\text{m}$ . After drying at 80°C for 12h to volatilize the solvent, the P(VDF-TrFE) polymer films with a thickness of  $\sim 20 \mu\text{m}$  were obtained. Then, the films were cut into samples of 80×100 mm<sup>2</sup> size, and both ends were clamped on a customized uniaxial drawing machine. The P(VDF-TrFE) films with stretch ratios  $R$  (final length to initial length) of three were obtained at a drawing speed of 12 mm s<sup>-1</sup>) and temperature of 100 °C and then served as tribomaterials to fabricate TENG device.



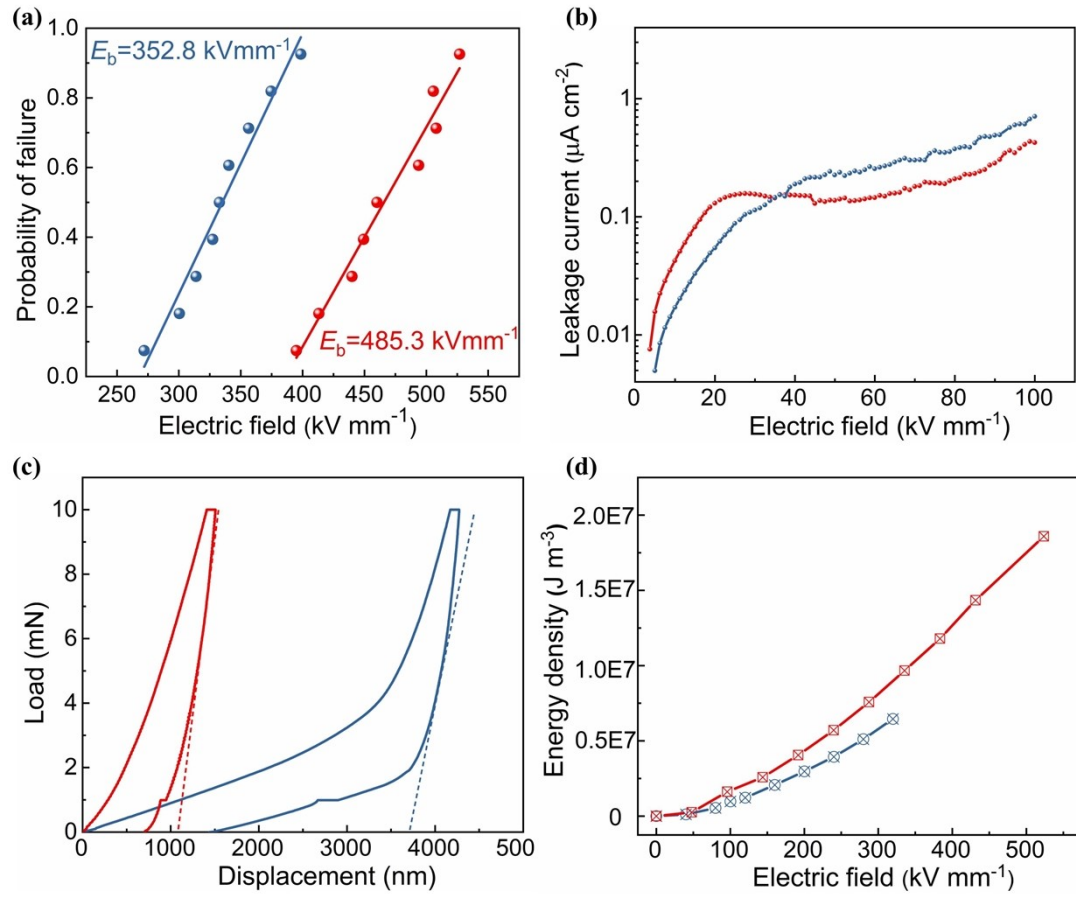

**Supplementary Figure 12.** Material characterization. (a) Electric breakdown strength, (b) Leakage current density, (c) Young's modulus, (d) Intrinsic energy storage density of the P(VDF-TrFE) film before and after uniaxial stretching.

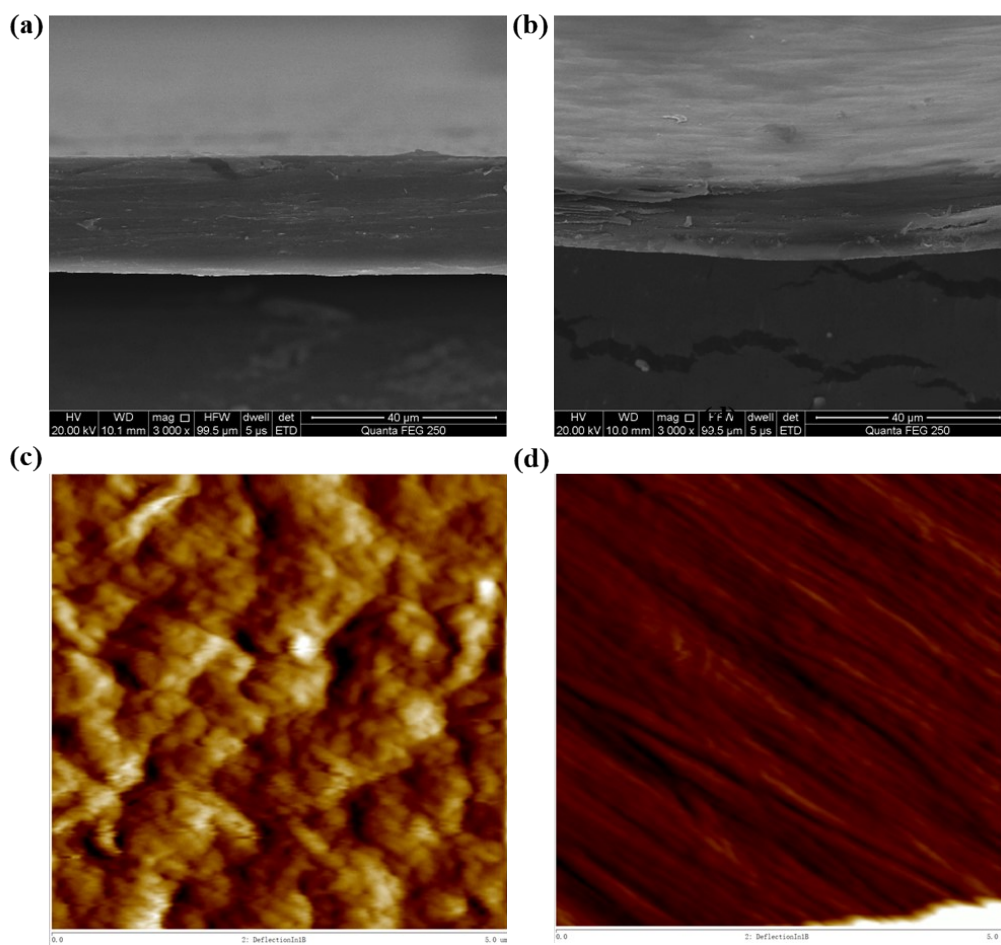

**Supplementary Figure 13.** (a, b) SEM images of P(VDF-TrFE) film before and after uniaxial stretching to characterize cross-section thickness. (c, d) AFM images of P(VDF-TrFE) film before and after uniaxial stretching to characterize surface morphology.

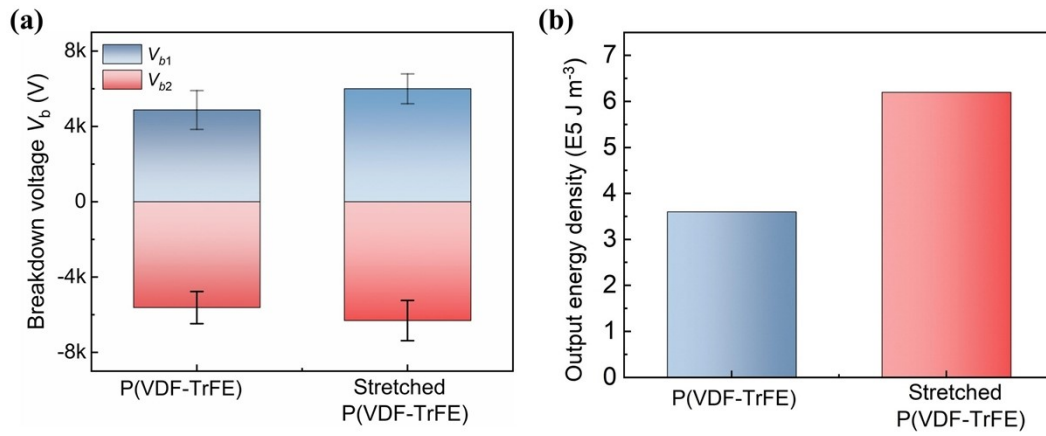

**Supplementary Figure 14.** Comparison of output performance. (a) Breakdown voltage, (b) Maximized output energy density of the TENG with Nylon/P(VDF-TrFE) film before and after uniaxial stretching.

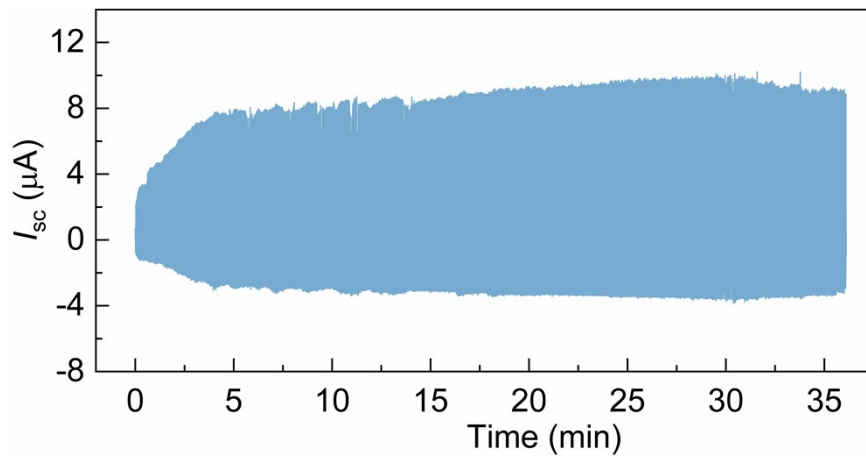

**Supplementary Figure 15.** The long-term stability of SFT-TENG using stretched P(VDF-TrFE) film as stator dielectric.

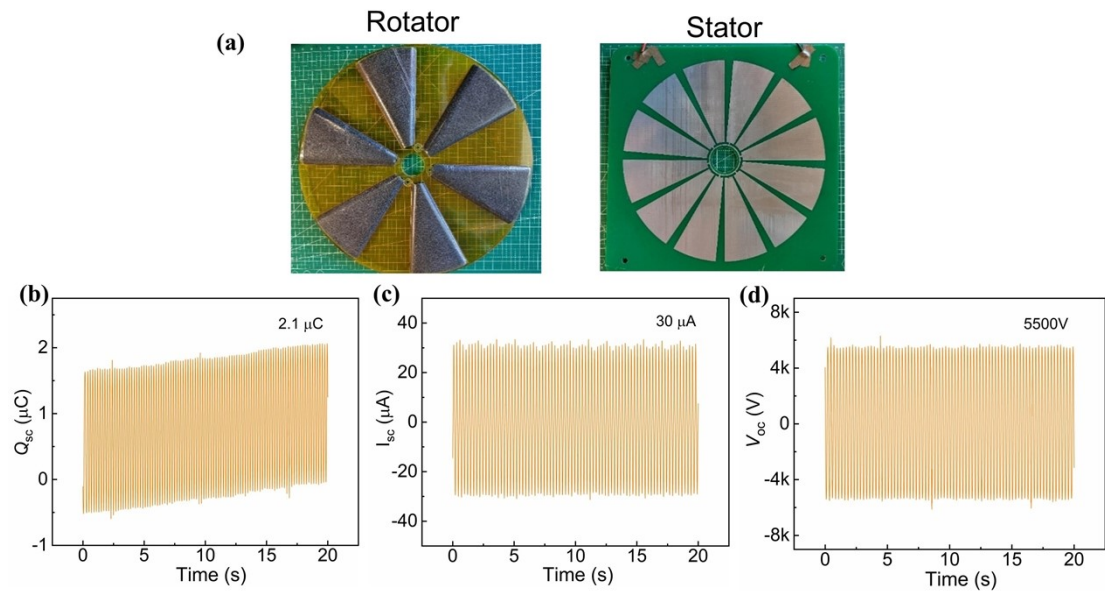

**Supplementary Figure 16.** (a) Photographs of the rotator and stator components of excitation-TENG. (b) Short-circuit charge  $Q_{sc}$ , (c) Short-circuit charge  $I_{sc}$ , and (d) Open-circuit voltage  $V_{oc}$  of excitation-TENG.

(a)

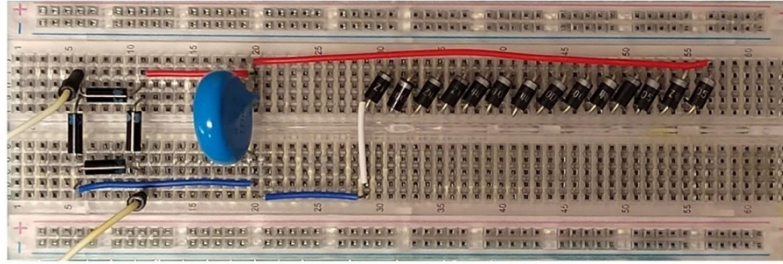

(b)

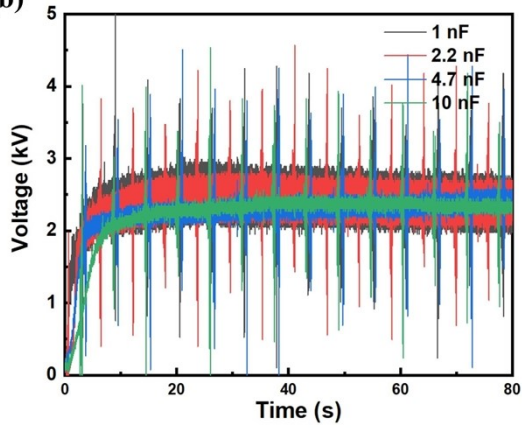

(c)

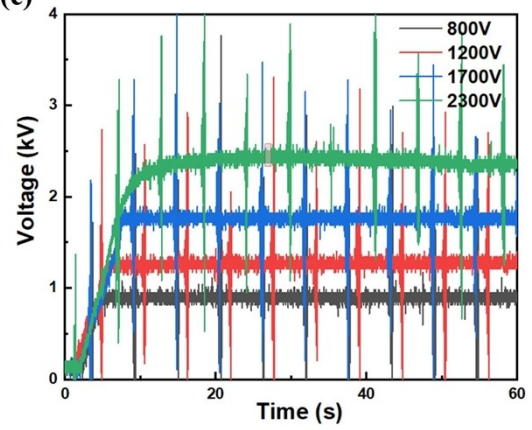

**Supplementary Figure S17.** (a) Photographs of the external management circuit.

Voltage performance of excitation TENG with different (b) buffer capacitors and (c)

Zener diodes in circuit.

**Supplementary Table 1** Key parameters for the plot of the  $V$ - $Q$  curve to evaluate the maximized output energy density of SFT-TENG with different stator dielectrics.

|    | Material                | $Q_{sc1}$<br>( $\mu$ C) | $Q_{sc2}$<br>( $\mu$ C) | $V_{b1}$<br>(V) | $V_{b2}$<br>(V) | Thickness<br>( $\mu$ m) |
|----|-------------------------|-------------------------|-------------------------|-----------------|-----------------|-------------------------|
| 1  | PTFE                    | 1.3                     | -1.4                    | 4125            | -4437.5         | 30                      |
| 2  | FEP                     | 0.9                     | 1.6                     | 3687.5          | -4062.5         | 20                      |
| 3  | PVC                     | 2.1                     | 4.3                     | 6250            | -6375           | 40                      |
| 4  | PVDF                    | 1.2                     | 2.8                     | 4662.5          | -5000           | 22                      |
| 5  | P(VDF-TrFE)             | 2.0                     | 4.1                     | 4875            | -5625           | 20                      |
| 6  | P(VDF-TrFE-CTFE) (PVTC) | 2.2                     | 3.8                     | 5737.5          | -6000           | 20                      |
| 7  | Kapton                  | 0.7                     | -1.0                    | 3600            | -3812.5         | 25                      |
| 8  | PFA                     | 1.4                     | 1.5                     | 4625            | -5500           | 35                      |
| 9  | PE                      | 1.36                    | 1.5                     | 4625            | -4875           | 25                      |
| 10 | PP                      | 1.1                     | 1.5                     | 4312.5          | -4687.5         | 25                      |
| 11 | Nylon                   | Slider dielectric       |                         |                 |                 | 25                      |

**Supplementary Table 2.** Summary of the key indexes of dielectric materials for the performance evaluation of charge density and output energy density.

| Material              | $\sigma_i$<br>(mC m <sup>-2</sup> ) | $\sigma_i^*$ | $\varepsilon_r$ | $\varepsilon_r^*$ | 1-Tan $\delta$ | (1-Tan $\delta$ )* | $E_b$<br>(kV mm <sup>-1</sup> ) | $E_b^*$ | $\sigma_{sc}$<br>(mC m <sup>-2</sup> ) | $U_m$<br>(10 <sup>5</sup> J m <sup>-3</sup> ) |
|-----------------------|-------------------------------------|--------------|-----------------|-------------------|----------------|--------------------|---------------------------------|---------|----------------------------------------|-----------------------------------------------|
| PVTC                  | 0.55                                | 0.92         | 32.7            | 1                 | 0.66           | 0.69               | 318.0                           | 0.65    | 2.2                                    | 4.3                                           |
| PVC                   | 0.60                                | 1            | 5.6             | 0.17              | 0.75           | 0.79               | 346.0                           | 0.71    | 2.3                                    | 3.8                                           |
| P(VDF-TrFE)           | 0.46                                | 0.76         | 8.5             | 0.26              | 0.71           | 0.75               | 352.8                           | 0.71    | 2.0                                    | 3.6                                           |
| PVDF                  | 0.32                                | 0.53         | 8.3             | 0.25              | 0.78           | 0.82               | 414.4                           | 0.85    | 1.4                                    | 2.1                                           |
| PE                    | 0.13                                | 0.21         | 2.7             | 0.08              | 0.9            | 0.95               | 438.3                           | 0.89    | 1.2                                    | 1.4                                           |
| PFA                   | 0.34                                | 0.57         | 2.4             | 0.07              | 0.93           | 0.98               | 450.2                           | 0.92    | 1.3                                    | 1.2                                           |
| PP                    | 0.11                                | 0.19         | 2.5             | 0.08              | 0.95           | 1                  | 490.2                           | 1       | 1.0                                    | 1.2                                           |
| FEP                   | 0.41                                | 0.69         | 2.4             | 0.07              | 0.88           | 0.93               | 373.9                           | 0.76    | 0.8                                    | 1.1                                           |
| PTFE                  | 0.43                                | 0.72         | 2.3             | 0.07              | 0.93           | 0.98               | 464.9                           | 0.95    | 1.2                                    | 0.9                                           |
| Kapton                | 0.31                                | 0.52         | 3.4             | 0.10              | 0.84           | 0.88               | 285.9                           | 0.58    | 0.7                                    | 0.7                                           |
| Stretched P(VDF-TrFE) | 0.55                                | 0.92         | 14.9            | 0.46              | 0.65           | 0.68               | 485.3                           | 0.99    | 2.8                                    | 6.2                                           |

*Noted: The material parameters marked with \* represent the normalized values.*

**Supplementary Table 3.** Comparison of multiple parameters and output performance among recently reported TENG.

|    | Structure Mode | Design Strategy                            | Dielectric material            | Charge density (mC m <sup>-2</sup> ) | Output voltage (V) | Output energy density (J m <sup>-3</sup> ) | Refs.                                     |
|----|----------------|--------------------------------------------|--------------------------------|--------------------------------------|--------------------|--------------------------------------------|-------------------------------------------|
| 1  | SFT (Rotary)   | Floating self-excited                      | 25µm nylon; 30µm PTFE          | 0.071                                | 470                | 1.2×10 <sup>3</sup>                        | Nat. Commun. 2021, 12:4689.               |
| 2  | SFT (Sliding)  | Non-contact mode                           | 50µm PTFE                      | 0.26                                 | 3879               | 1.4×10 <sup>4</sup>                        | Adv. Energy Mater. 2022, 12, 2201708.     |
| 3  | SFT (Sliding)  | Liquid suspension                          | 25µm nylon; 25µm nylon         | 0.704                                | 4200               | 5.4×10 <sup>4</sup>                        | Adv. Mater. 2022, 2209657.                |
| 4  | SFT (Sliding)  | Charge space-accumulation                  | 25µm nylon; 50µm PTFE          | 1.63                                 | 3000               | 2.6×10 <sup>4</sup>                        | Nat. Commun. 2020, 11:4277.               |
| 5  | SFT (Sliding)  | Charge pumping                             | 50µm PET; 50µm Kapton          | 1.328                                | 1400               | 3.7×10 <sup>4</sup>                        | Adv. Energy Mater. 2021, 11, 2101147.     |
| 6  | SFT (Sliding)  | Charge migration for volume effect         | 1mm PU; 100µm FEP              | 0.37                                 | 3000               | 9.9×10 <sup>2</sup>                        | Adv. Mater. 2023,2302954.                 |
| 7  | SFT (Sliding)  | Charge reversion process                   | 30µm PI                        | 0.78                                 | -                  | 6.1×10 <sup>3</sup>                        | Energy Environ. Sci., 2023,16, 5294-5304. |
| 8  | CS             | Self-Polarization Effect                   | 7.5µm BaTiO <sub>3</sub> /PVDF | 1.67                                 | 600                | 3.6×10 <sup>3</sup>                        | Adv. Funct. Mater. 2022, 2204322.         |
| 9  | CS             | Polar High-k Material                      | 0.1wt%PZT/PVDF                 | 3.53                                 | 900                | 3.6×10 <sup>4</sup>                        | Adv. Mater. 2022, 34, 2109918.            |
| 10 | CS             | Charge trapping failure                    | 10µm, CP/PVDF                  | 4.13                                 | 700                | 5.8×10 <sup>4</sup>                        | Energy Environ. Sci., 2023,16, 2274-2283. |
| 11 | CS             | Ultra-fast charge self-injection technique | PVDF-TrFE                      | 2.67                                 | 700                | 2.5×10 <sup>5</sup>                        | Adv. Mater. 2024,36,2312148.              |
| 12 | CS             | Suppressing air breakdown and              | 7µm PVDF+PI                    | 2.2                                  | 1385               | 8.0×10 <sup>4</sup>                        | Adv. Energy Mater. 2024,                  |



|    |               |                                                 |                            |      |      |                    |                                           |
|----|---------------|-------------------------------------------------|----------------------------|------|------|--------------------|-------------------------------------------|
|    |               | dielectric leakage                              |                            |      |      |                    | 14,2303874.                               |
| 13 | CS            | Annealing treatment                             | 8μm Annealed PVTC          | 8.6  | 600  | $1.01 \times 10^5$ | Energy Environ. Sci., 2024,17, 3819-3831. |
| 14 | CS            | Inhibiting charge injection and dielectric loss | PZT5H+PVTC 1mm+5μm         | 2.83 | 750  | $4.2 \times 10^3$  | Adv. Energy Mater. 2024, 2400429.         |
| 15 | SFT (Sliding) | Charge excitation                               | 14μm Stretched P(VDF-TrFE) | 2.8  | 6000 | $6.2 \times 10^5$  | <b>This work</b>                          |

---
